# Supplementary material
Source: MDPI journal article supplement (https://www.mdpi.com/2076-3263/9/5/243)
Supplement: s1 [file s1]

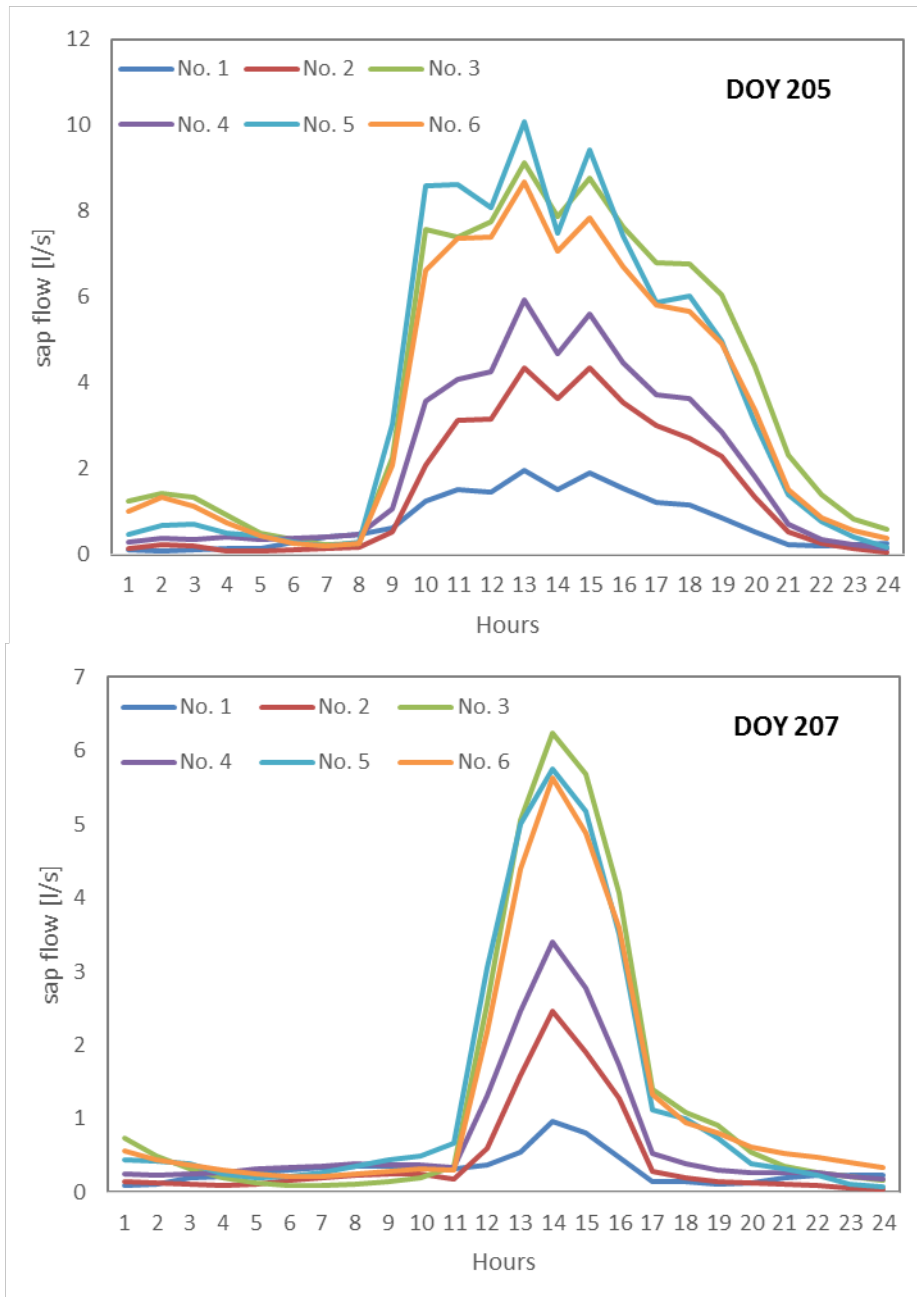

**Figure S1.** The diurnal pattern of the measured sap flow in 6 trees (the sizes of the six trees in corresponding numbers are given in Fig. 3a.) at two selected days—DOY 205 and DOY 207.
